# Supplementary material for: Unintended Consequences: Nutritional Impact and Potential Pitfalls of Switching from Animal- to Plant-Based Foods
Source: MDPI journal article supplement (doi:10.3390/nu13082527), 2021-07-23
Supplement: s1 [file s1]

## Supplementary Material

**Table S1: Reference Diet**

|                        | Item                                         | Serving       | Calories      | Carbs (g)    | Protein (g)  | Total Fat (g) | Sat Fat (g) | Chol (mg)    | Sodium (mg)   | Sugar (g)    | Dietary Fibre (g) | B12 (ug)   | Calcium (mg)  | Potassium (mg) | Magnesium (mg) | Phosphorus (mg) | Zinc (mg)   | Iron (mg)   |
|------------------------|----------------------------------------------|---------------|---------------|--------------|--------------|---------------|-------------|--------------|---------------|--------------|-------------------|------------|---------------|----------------|----------------|-----------------|-------------|-------------|
| <b>Breakfast</b>       | White bread <sup>1</sup>                     | 2 slices, 95g | 237.50        | 47.50        | 6.48         | 2.16          | 0           | 0            | 453.41        | 4.32         | 2.18              | 0          | 86.36         | 111.15         | 34.11          | 97.85           | 0.84        | 4.64        |
|                        | Butter <sup>1</sup>                          | 13g           | 93.38         | 0.008        | 0            | 10.53         | 6.67        | 27.92        | 83.58         | 0.008        | 0                 | 0.02       | 3.12          | 3.12           | 0.26           | 3.12            | 0.01        | 0.003       |
|                        | Bacon <sup>1</sup>                           | 29g           | 134.30        | 0.17         | 2.64         | 13.84         | 1.11        | 6.24         | 873.63        | 0.12         | 0                 | 0.05       | 1.26          | 26.29          | 2.62           | 31.20           | 0.16        | 0.06        |
|                        | Hardboiled egg <sup>1</sup>                  | 38g           | 58.90         | 0.43         | 4.78         | 4.03          | 1.24        | 141.36       | 47.12         | 0.43         | 0                 | 0.42       | 19.00         | 47.88          | 3.80           | 65.36           | 0.40        | 0.45        |
|                        | Low fat milk <sup>1</sup>                    | 200ml         | 80.00         | 9.10         | 6.34         | 2.02          | 1.27        | 8.00         | 102.00        | 9.10         | 0                 | 0.70       | 226.00        | 314.00         | 22.00          | 170.00          | 0.74        | 0.06        |
| <b>Morning Snack</b>   | Black coffee <sup>1</sup>                    | 250ml         | 5.00          | 0.85         | 0.25         | 0             | 0.01        | 0            | 10.00         | 0            | 0                 | 0          | 10.00         | 75.00          | 10.00          | 7.50            | 0.03        | 0.10        |
| <b>Lunch</b>           | Beef burger with low fat cheese <sup>1</sup> | 245g          | 487.60        | 28.18        | 40.05        | 23.53         | 7.79        | 100.65       | 932.65        | 12.26        | 6.91              | 3.17       | 305.65        | 504.27         | 61.35          | 425.65          | 7.89        | 3.05        |
|                        | French fries <sup>1,2</sup>                  | 117g          | 365.00        | 48.40        | 4.01         | 17.20         | 2.74        | 0            | 246.00        | 0            | 4.00              | 0          | 21.10         | 527.67         | 43.30          | 146.00          | 0.59        | 0.95        |
|                        | Soda <sup>1,2</sup>                          | 620ml         | 210.00        | 56.00        | 0            | 0             | 0           | 0            | 55.00         | 56.00        | 0                 | 0          | 6.20          | 31.00          | 0              | 55.80           | 0.56        | 0.12        |
| <b>Afternoon Snack</b> | Low fat yogurt <sup>1</sup>                  | 140g          | 88.12         | 9.88         | 7.35         | 2.17          | 1.40        | 8.40         | 98.00         | 9.88         | 0                 | 0.78       | 256.12        | 327.76         | 23.80          | 201.76          | 1.24        | 0.11        |
|                        | Strawberries <sup>1</sup>                    | 100g          | 32.00         | 7.68         | 0.67         | 0.30          | 0.02        | 0            | 1.00          | 4.89         | 2.00              | 0          | 16.00         | 153.00         | 13.00          | 24.00           | 0.14        | 0.41        |
| <b>Evening Meal</b>    | Grilled chicken <sup>1</sup>                 | 100g          | 202.35        | 7.34         | 21.18        | 9.15          | 2.11        | 78.00        | 454.12        | 5.98         | 0.20              | 0.14       | 12.00         | 280.00         | 22.00          | 160.00          | 0.74        | 0.55        |
|                        | Stir-fried spinach <sup>1,2</sup>            | 91g           | 150.85        | 5.88         | 2.29         | 13.76         | 1.03        | 0            | 906.05        | 0.27         | 1.51              | 0          | 64.88         | 395.78         | 51.62          | 42.95           | 0.40        | 1.85        |
|                        | White rice <sup>1</sup>                      | 125g          | 161.25        | 34.99        | 3.34         | 0.35          | 0.10        | 0            | 306.25        | 0.06         | 0.50              | 0          | 12.50         | 43.75          | 15.00          | 53.75           | 0.61        | 1.49        |
| <b>Dessert</b>         | Ice cream <sup>1,3</sup>                     | 80g           | 112.80        | 18.75        | 3.75         | 2.50          | 1.87        | 12.80        | 75.20         | 15.00        | 0                 | 0.40       | 96.80         | 99.20          | 9.60           | 71.20           | 0.42        | 1.65        |
|                        | Peach <sup>1</sup>                           | 150g          | 63.00         | 15.20        | 1.36         | 0.41          | 0.03        | 0            | 19.50         | 12.60        | 2.25              | 0          | 6.00          | 183.00         | 12.00          | 33.00           | 0.35        | 0.51        |
| <b>Total</b>           |                                              |               | <b>2482.1</b> | <b>290.4</b> | <b>104.5</b> | <b>101.9</b>  | <b>27.4</b> | <b>383.4</b> | <b>4663.5</b> | <b>130.9</b> | <b>19.5</b>       | <b>5.7</b> | <b>1143.0</b> | <b>3122.8</b>  | <b>324.5</b>   | <b>1589.1</b>   | <b>15.1</b> | <b>16.0</b> |

Sources: <sup>1</sup> United States Department of Agriculture [1], <sup>2</sup> Internet sources [2], <sup>3</sup> Health Promotion Board [3]. Nutritional information of all food items (as prepared and ready-to-eat) was calculated by adding fat (oil), and sodium (salt) and/or garnishes such as garlic to raw ingredients. Dashes denote values not listed on nutritional labels or in databases. Carbs = carbohydrate; Sat Fat = saturated fat; Chol = cholesterol; B12 = Vitamin B12.

Table S2: Flexitarian-Traditional (Flex-Trad) Diet

|                    | Item                                                               | Serving          | Calorie<br>s | Carbs<br>(g) | Protein<br>(g) | Total<br>Fat<br>(g) | Sat<br>Fat (g) | Chol<br>(mg) | Sodium<br>(mg) | Suga<br>r (g) | Dietar<br>y<br>Fibre<br>(g) | B12<br>(ug) | Calciu<br>m (mg) | Potassiu<br>m (mg) | Magnesi<br>um (mg) | Phosphoru<br>s (mg) | Zinc<br>(mg) | Iron<br>(mg) |
|--------------------|--------------------------------------------------------------------|------------------|--------------|--------------|----------------|---------------------|----------------|--------------|----------------|---------------|-----------------------------|-------------|------------------|--------------------|--------------------|---------------------|--------------|--------------|
| Breakfast          | White bread <sup>1</sup>                                           | 2 slices,<br>95g | 237.50       | 47.50        | 6.48           | 2.16                | 0              | 0            | 453.41         | 4.32          | 2.18                        | 0           | 86.36            | 111.15             | 34.11              | 97.85               | 0.84         | 4.64         |
|                    | Olive-based<br>margarine <sup>1,2</sup>                            | 14g              | 70.28        | 0.07         | 0.04           | 7.90                | 1.54           | 0            | 37.38          | 0             | 0                           | 0.003       | 0                | 2.38               | 0.14               | 0.42                | 0            | 0            |
|                    | Egg omelette<br>with spinach<br>and low fat<br>cheese <sup>1</sup> | 129g             | 267.05       | 2.84         | 17.09          | 20.70               | 3.79           | 198.25       | 155.35         | 1.15          | 0.66                        | 1.14        | 391.05           | 269.25             | 41.30              | 312.45              | 2.05         | 1.47         |
|                    | Low fat milk <sup>1</sup>                                          | 200ml            | 80.00        | 9.10         | 6.34           | 2.02                | 1.27           | 8.00         | 102.00         | 9.10          | 0.00                        | 0.70        | 226.00           | 314.00             | 22.00              | 170.00              | 0.74         | 0.06         |
| Morning<br>Snack   | Black coffee <sup>1</sup>                                          | 250ml            | 5.00         | 0.85         | 0.25           | 0                   | 0.01           | 0            | 10.00          | 0             | 0                           | 0           | 10.00            | 75.00              | 10.00              | 7.50                | 0.03         | 0.10         |
| Lunch              | Bean burrito<br>with low fat<br>cheese <sup>1</sup>                | 281g             | 415.60       | 58.22        | 25.70          | 8.33                | 3.75           | 17.50        | 1052.90        | 8.73          | 6.96                        | 0.84        | 626.65           | 611.80             | 87.70              | 542.35              | 2.93         | 4.17         |
|                    | French fries <sup>1,3</sup>                                        | 117g             | 365.00       | 48.40        | 4.01           | 17.20               | 2.74           | 0            | 246.00         | 0             | 4.00                        | 0           | 21.10            | 527.67             | 43.30              | 146.00              | 0.59         | 0.95         |
|                    | Soda <sup>1,3</sup>                                                | 620ml            | 210.00       | 56.00        | 0              | 0                   | 0              | 0            | 55.00          | 56.00         | 0                           | 0           | 6.20             | 31.00              | 0                  | 55.80               | 0.56         | 0.12         |
| Afternoon<br>Snack | Unsalted nuts <sup>1</sup>                                         | 35g              | 205.45       | 7.44         | 8.52           | 17.38               | 2.70           | 0            | 2.10           | 1.72          | 2.94                        | 0           | 20.30            | 221.90             | 62.30              | 127.05              | 0.97         | 0.55         |
|                    | Peach <sup>1</sup>                                                 | 150g             | 63.00        | 15.20        | 1.36           | 0.41                | 0.03           | 0            | 19.50          | 12.60         | 2.25                        | 0           | 6.00             | 183.00             | 12.00              | 33.00               | 0.35         | 0.51         |
| Evening Meal       | Grilled<br>chicken <sup>1</sup>                                    | 100g             | 202.35       | 7.34         | 21.18          | 9.15                | 2.11           | 78.00        | 454.12         | 5.98          | 0.20                        | 0.14        | 12.00            | 280.00             | 22.00              | 160.00              | 0.74         | 0.55         |
|                    | Stir-fried<br>broccoli <sup>1,2</sup>                              | 102g             | 123.90       | 9.06         | 2.78           | 9.31                | 0.76           | 0            | 998.30         | 1.42          | 2.24                        | 0           | 39.80            | 296.30             | 17.88              | 66.30               | 0.40         | 0.70         |
|                    | White rice <sup>1</sup>                                            | 85g              | 109.65       | 23.79        | 2.27           | 0.24                | 0.07           | 0            | 208.25         | 0.04          | 0.34                        | 0           | 8.50             | 29.75              | 10.20              | 36.55               | 0.42         | 1.01         |
| Dessert            | Low fat<br>yogurt <sup>1</sup>                                     | 125g             | 78.68        | 8.82         | 6.56           | 1.94                | 1.25           | 7.50         | 87.50          | 8.82          | 0                           | 0.70        | 228.68           | 292.65             | 21.25              | 180.15              | 1.11         | 0.10         |
|                    | Banana <sup>1,2</sup>                                              | 50g              | 44.50        | 9.40         | 0.55           | 0.17                | 0.06           | 0.00         | 0.50           | 6.10          | 1                           | 0.00        | 2.50             | 179.00             | 16.50              | 11.00               | 0.08         | 0.13         |
| Total              |                                                                    |                  | 2478.0       | 304.0        | 103.1          | 96.9                | 20.1           | 309.3        | 3882.3         | 116.0         | 23.1                        | 3.5         | 1685.1           | 3424.8             | 400.7              | 1946.4              | 11.8         | 15.1         |

Sources: <sup>1</sup> United States Department of Agriculture [1], <sup>2</sup> Health Promotion Board [3], <sup>3</sup> Internet sources [2]. Nutritional information of all food items (as prepared and ready-to-eat) was calculated by adding fat (oil), and sodium (salt) and/or garnishes such as garlic to raw ingredients. Dashes denote values not listed on nutritional labels or in databases. Carbs = carbohydrate; Sat Fat = saturated fat; Chol = cholesterol; B12 = Vitamin B12.

Table S3: Flexitarian-Novel (Flex-New) Diet

|                 | Item                                                  | Serving       | Calories        | Carbs (g)      | Protein (g) | Total Fat (g) | Sat Fat (g) | Chol (mg) | Sodium (mg)    | Sugar (g)  | Dietary Fibre (g) | B12 (ug) | Calcium (mg) | Potassium (mg)  | Magnesium (mg) | Phosphorus (mg) | Zinc (mg)    | Iron (mg)    |
|-----------------|-------------------------------------------------------|---------------|-----------------|----------------|-------------|---------------|-------------|-----------|----------------|------------|-------------------|----------|--------------|-----------------|----------------|-----------------|--------------|--------------|
| Breakfast       | White bread <sup>1</sup>                              | 2 slices, 95g | 237.50          | 47.50          | 6.48        | 2.16          | 0           | 0         | 453.41         | 4.32       | 2.18              | 0        | 86.36        | 111.15          | 34.11          | 97.85           | 0.84         | 4.64         |
|                 | Olive-based margarine <sup>1,2</sup>                  | 7g            | 35.14           | 0.04           | 0.02        | 3.95          | 0.77        | 0         | 18.69          | 0          | 0                 | 0.001    | 0            | 1.19            | 0.07           | 0.21            | 0            | 0            |
|                 | Egg omelette <sup>1</sup>                             | 85g           | 162.32          | 0.93           | 10.06       | 13.04         | 6.40        | 297.60    | 875.20         | 0.90       | 0                 | 0.89     | 40.53        | 100.96          | 8.02           | 137.60          | 0.84         | 0.96         |
|                 | Bacon, meatless <sup>1</sup>                          | 16g           | 59.33           | 0.71           | 1.52        | 6.11          | 2.50        | 0         | 383.80         | 0          | 0.34              | 0        | 3.13         | 22.14           | 2.48           | 9.10            | 0.06         | 0.32         |
|                 | Ketchup <sup>1</sup>                                  | 8g            | 7.58            | 2.06           | 0.08        | 0.01          | 0           | 0         | 68.03          | 1.60       | 0.02              | 0        | 1.13         | 21.08           | 0.98           | 1.95            | 0.01         | 0.03         |
|                 | Low fat milk <sup>1</sup>                             | 200ml         | 80.00           | 9.10           | 6.34        | 2.02          | 1.27        | 8.00      | 102.00         | 9.10       | 0                 | 0.70     | 226.00       | 314.00          | 22.00          | 170.00          | 0.74         | 0.06         |
| Morning Snack   | Black coffee <sup>1</sup>                             | 250ml         | 5.00            | 0.85           | 0.25        | 0             | 0.01        | 0         | 10.00          | 0          | 0                 | 0        | 10.00        | 75.00           | 10.00          | 7.50            | 0.03         | 0.10         |
|                 | Plant-based beef jerky <sup>1</sup>                   | 38g           | 121.98          | 10.86          | 13.57       | 1.36          | 0           | 0         | 868.68         | 5.43       | 0                 | 0        | 0            | 0               | 7.30           | 145.01          | 0.75         | 1.63         |
| Lunch           | Plant-based burger with low fat cheese <sup>1,3</sup> | 257g          | 506.07          | 31.01          | 36.99       | 26.70         | 9.61        | 19.60     | 1794.51        | 10.82      | 8.59              | 0.71     | 528.68       | 449.89          | 37.52          | 335.35          | 2.37         | 4.17         |
|                 | French fries <sup>1,3</sup><br>Soda <sup>1,3</sup>    | 31g<br>620ml  | 96.71<br>210.00 | 12.82<br>56.00 | 1.06<br>0   | 4.56<br>0     | 0.73<br>0   | 0<br>0    | 65.18<br>55.00 | 0<br>56.00 | 1.06<br>0         | 0<br>0   | 5.59<br>6.20 | 139.81<br>31.00 | 11.47<br>0     | 38.68<br>55.80  | 0.16<br>0.56 | 0.25<br>0.12 |
| Afternoon Snack | Strawberries <sup>1</sup>                             | 100g          | 32.00           | 7.68           | 0.67        | 0.30          | 0.02        | 0         | 1.00           | 4.89       | 2.00              | 0        | 16.00        | 153.00          | 13.00          | 24.00           | 0.14         | 0.41         |
|                 | Coconut yogurt <sup>1</sup>                           | 170g          | 261.80          | 13.28          | 0           | 19.92         | 17.27       | 0         | 34.00          | 13.28      | 1.36              | 0        | 0            | 95.20           | 42.5           | 51              | 0.68         | 2.04         |
| Evening Meal    | Plant-based chicken tenders <sup>1,3</sup>            | 104g          | 193.13          | 15.70          | 13.73       | 9.83          | 1.65        | 0         | 1226.98        | 0          | 0                 | 0        | 0.50         | 0.16            | 17.02          | 335.00          | 0.70         | 2.36         |
|                 | Ketchup <sup>1</sup>                                  | 8g            | 7.58            | 2.06           | 0.08        | 0.01          | 0           | 0         | 68.03          | 1.60       | 0.02              | 0        | 1.13         | 21.08           | 0.98           | 1.95            | 0.01         | 0.03         |
|                 | Stir-fried broccoli <sup>1,2</sup>                    | 93g           | 65.56           | 9.08           | 2.78        | 2.89          | 2.24        | 0         | 222.30         | 1.42       | 2.24              | 0        | 39.35        | 296.14          | 17.86          | 66.30           | 0.40         | 0.69         |
|                 | White rice <sup>1</sup>                               | 100g          | 129.00          | 27.99          | 2.67        | 0.28          | 0.08        | 0         | 245.00         | 0.05       | 0.40              | 0        | 10.00        | 35.00           | 12.00          | 43.00           | 0.49         | 1.19         |
| Dessert         | Vegan coconut ice cream <sup>1</sup>                  | 55g           | 161.15          | 13.75          | 1.79        | 12.56         | 7.77        | 0         | 2.75           | 10.16      | 1.21              | 0        | 12.10        | 120.04          | 20.08          | 33.00           | 0.45         | 0.86         |
|                 | Peach <sup>1</sup>                                    | 150g          | 63.00           | 15.20          | 1.36        | 0.41          | 0.03        | 0         | 19.50          | 12.60      | 2.25              | 0        | 6.00         | 183.00          | 12.00          | 33.00           | 0.35         | 0.51         |
| Total           |                                                       |               | 2434.8          | 276.6          | 99.4        | 106.1         | 50.4        | 325.2     | 6514.0         | 132.2      | 21.7              | 2.3      | 992.7        | 2169.8          | 269.4          | 1586.3          | 9.6          | 20.4         |

Sources: <sup>1</sup> United States Department of Agriculture [1], <sup>2</sup> Health Promotion Board [3], <sup>3</sup> Internet sources [2,4,5], <sup>4</sup> On-pack nutritional labels. Nutritional information of all food items (as prepared and ready-to-eat) was calculated by adding fat (oil), and sodium (salt) and/or garnishes such as garlic to raw ingredients. Dashes denote values not listed on nutritional labels or in databases. Carbs = carbohydrate; Sat Fat = saturated fat; Chol = cholesterol; B12 = Vitamin B12.

Table S4: Vegetarian-Traditional (Veg-Trad) Diet

|                    | Item                                                               | Serving          | Calorie<br>s | Carbs<br>(g) | Protein<br>(g) | Total<br>Fat<br>(g) | Sat<br>Fat (g) | Chol<br>(mg) | Sodium<br>(mg) | Suga<br>r (g) | Dietar<br>y<br>Fibre<br>(g) | B12<br>(ug) | Calciu<br>m (mg) | Potassiu<br>m (mg) | Magnesi<br>um (mg) | Phosphoru<br>s (mg) | Zinc<br>(mg) | Iron<br>(mg) |
|--------------------|--------------------------------------------------------------------|------------------|--------------|--------------|----------------|---------------------|----------------|--------------|----------------|---------------|-----------------------------|-------------|------------------|--------------------|--------------------|---------------------|--------------|--------------|
| Breakfast          | White bread <sup>1</sup>                                           | 2 slices,<br>95g | 237.50       | 47.50        | 6.48           | 2.16                | 0              | 0            | 453.41         | 4.32          | 2.18                        | 0           | 86.36            | 111.15             | 34.11              | 97.85               | 0.84         | 4.64         |
|                    | Olive-based<br>margarine <sup>1,2</sup>                            | 18g              | 90.36        | 0.09         | 0.05           | 10.15               | 1.98           | 0            | 48.06          | 0             | 0                           | 0.004       | 0                | 3.06               | 0.18               | 0.54                | 0            | 0            |
|                    | Egg omelette<br>with spinach<br>and low fat<br>cheese <sup>1</sup> | 119g             | 218.10       | 2.67         | 15.67          | 15.95               | 3.30           | 196.50       | 145.40         | 1.09          | 0.66                        | 1.06        | 343.00           | 263.70             | 39.50              | 282.20              | 1.85         | 1.46         |
|                    | Low fat milk <sup>1</sup>                                          | 200ml            | 80.00        | 9.10         | 6.34           | 2.02                | 1.27           | 8.00         | 102.00         | 9.10          | 0                           | 0.70        | 226.00           | 314.00             | 22.00              | 170.00              | 0.74         | 0.06         |
| Morning<br>Snack   | Strawberries <sup>1</sup>                                          | 100g             | 32.00        | 7.68         | 0.67           | 0.30                | 0.02           | 0            | 1.00           | 4.89          | 2.00                        | 0           | 16.00            | 153.00             | 13.00              | 24.00               | 0.14         | 0.41         |
|                    | Black coffee <sup>1</sup>                                          | 250ml            | 5.00         | 0.85         | 0.25           | 0                   | 0.01           | 0            | 10.00          | 0             | 0                           | 0           | 10.00            | 75.00              | 10.00              | 7.50                | 0.03         | 0.10         |
| Lunch              | Bean burrito<br>with low fat<br>cheese <sup>1</sup>                | 281g             | 415.60       | 58.22        | 25.70          | 8.33                | 3.75           | 17.50        | 1052.90        | 8.73          | 6.96                        | 0.84        | 626.65           | 611.80             | 70.70              | 542.35              | 2.93         | 4.17         |
|                    | French fries <sup>1,3</sup>                                        | 117g             | 365.00       | 48.40        | 4.01           | 17.20               | 2.74           | 0            | 246.00         | 0             | 4.00                        | 0           | 21.10            | 527.67             | 43.30              | 146.00              | 0.59         | 0.95         |
|                    | Soda <sup>1,3</sup>                                                | 620ml            | 210.00       | 56.00        | 0              | 0                   | 0              | 0            | 55.00          | 56.00         | 0                           | 0           | 6.20             | 31.00              | 0                  | 55.80               | 0.56         | 0.12         |
| Afternoon<br>Snack | Unsalted nuts <sup>1</sup>                                         | 25g              | 146.75       | 5.32         | 6.09           | 12.42               | 1.93           | 0            | 1.50           | 1.23          | 2.10                        | 0           | 14.50            | 158.50             | 44.50              | 90.75               | 0.69         | 0.40         |
|                    | Peach <sup>1</sup>                                                 | 150g             | 63.00        | 15.20        | 1.36           | 0.41                | 0.03           | 0            | 19.50          | 12.60         | 2.25                        | 0           | 6.00             | 183.00             | 12.00              | 33.00               | 0.35         | 0.51         |
| Evening Meal       | Tofu <sup>1,2</sup>                                                | 127g             | 161.20       | 3.04         | 12.16          | 10.57               | 1.09           | 0.00         | 798.80         | 0.00          | 1.56                        | 0.00        | 91.68            | 379.36             | 32.42              | 142.80              | 1.32         | 1.65         |
|                    | Stir-fried<br>broccoli and<br>spinach <sup>1,2</sup>               | 115g             | 79.66        | 8.11         | 2.54           | 4.78                | 0.41           | 0.00         | 224.98         | 1.11          | 1.96                        | 0.00        | 41.40            | 297.30             | 22.94              | 58.38               | 0.37         | 0.86         |
|                    | White rice <sup>1</sup>                                            | 75g              | 96.75        | 20.99        | 2.00           | 0.21                | 0.06           | 0.00         | 183.75         | 0.04          | 0.30                        | 0.00        | 7.50             | 26.25              | 9.00               | 32.25               | 0.37         | 0.89         |
| Dessert            | Low fat<br>yogurt <sup>1</sup>                                     | 220g             | 138.47       | 15.53        | 11.54          | 3.42                | 2.20           | 13.20        | 154.00         | 15.53         | 0.00                        | 1.23        | 402.47           | 515.06             | 37.40              | 317.06              | 1.95         | 0.18         |
|                    | Unsalted nuts <sup>1</sup>                                         | 25g              | 146.75       | 5.32         | 6.09           | 12.42               | 1.93           | 0            | 1.50           | 1.23          | 2.10                        | 0           | 14.50            | 158.50             | 44.50              | 90.75               | 0.69         | 0.40         |
| Total              |                                                                    |                  | 2486.1       | 304.0        | 100.9          | 100.3               | 20.7           | 235.2        | 3497.8         | 115.8         | 26.1                        | 3.8         | 1913.4           | 3808.3             | 435.5              | 2091.2              | 13.4         | 16.8         |

Sources: <sup>1</sup> United States Department of Agriculture [1], <sup>2</sup> Health Promotion Board [3], <sup>3</sup> Internet sources [2]. Nutritional information of all food items (as prepared and ready-to-eat) was calculated by adding fat (oil), and sodium (salt) and/or garnishes such as garlic to raw ingredients. Dashes denote values not listed on nutritional labels or in databases. Carbs = carbohydrate; Sat Fat = saturated fat; Chol = cholesterol; B12 = Vitamin B12.

Table S5: Vegetarian-Novel (Veg-New) Diet

|                    | Item                                                                       | Serving          | Calorie<br>s | Carbs<br>(g) | Protein<br>(g) | Total<br>Fat<br>(g) | Sat<br>Fat (g) | Chol<br>(mg) | Sodium<br>(mg) | Suga<br>r (g) | Dietar<br>y<br>Fibre<br>(g) | B12<br>(ug) | Calciu<br>m (mg) | Potassiu<br>m (mg) | Magnesi<br>m (mg) | Phosphoru<br>s (mg) | Zinc<br>(mg) | Iron<br>(mg) |
|--------------------|----------------------------------------------------------------------------|------------------|--------------|--------------|----------------|---------------------|----------------|--------------|----------------|---------------|-----------------------------|-------------|------------------|--------------------|-------------------|---------------------|--------------|--------------|
| Breakfast          | White bread <sup>1</sup>                                                   | 2 slices,<br>95g | 237.50       | 47.50        | 6.48           | 2.16                | 0              | 0            | 453.41         | 4.32          | 2.18                        | 0           | 86.36            | 111.15             | 34.11             | 97.85               | 0.84         | 4.64         |
|                    | Olive-based<br>margarine <sup>1,2</sup>                                    | 7g               | 35.14        | 0.04         | 0.02           | 3.95                | 0.77           | 0            | 18.69          | 0             | 0                           | 0           | 0                | 1.19               | 0.07              | 0.21                | 0            | 0            |
|                    | Plant-based<br>egg omelette<br>with dairy-<br>free cheese <sup>1,2,3</sup> | 115g             | 236.43       | 7.84         | 9.09           | 18.37               | 7.90           | 0            | 1549.09        | 0             | 0                           | 0           | 4.94             | 46.96              | 14.21             | 19.64               | 0.14         | 0.23         |
|                    | Bacon,<br>meatless <sup>1</sup>                                            | 18g              | 78.49        | 0.73         | 1.52           | 8.39                | 4.40           | 0            | 383.80         | 0             | 0.34                        | 0           | 3.16             | 22.14              | 2.48              | 9.10                | 0.06         | 0.32         |
|                    | Ketchup <sup>1</sup>                                                       | 15g              | 15.15        | 4.11         | 0.16           | 0.02                | 0              | 0            | 136.05         | 3.20          | 0.05                        | 0           | 2.25             | 42.15              | 1.95              | 3.90                | 0.03         | 0.05         |
|                    | Low fat milk <sup>1</sup>                                                  | 200ml            | 80.00        | 9.10         | 6.34           | 2.02                | 1.27           | 8.00         | 102.00         | 9.10          | 0                           | 0.70        | 226.00           | 314.00             | 22.00             | 170.00              | 0.74         | 0.06         |
| Morning<br>Snack   | Black coffee <sup>1</sup>                                                  | 250ml            | 5.00         | 0.85         | 0.25           | 0                   | 0.01           | 0            | 10.00          | 0             | 0                           | 0           | 10.00            | 75.00              | 10.00             | 7.50                | 0.03         | 0.10         |
|                    | Plant-based<br>beef jerky <sup>1</sup>                                     | 35g              | 112.35       | 10.00        | 12.50          | 1.25                | 0              | 0            | 800.10         | 5.01          | 0                           | 0           | 0                | 0                  | 6.72              | 133.56              | 0.69         | 1.50         |
| Lunch              | Plant-based<br>burger with<br>low fat<br>cheese <sup>1,3</sup>             | 252g             | 492.17       | 32.66        | 33.66          | 26.09               | 9.22           | 15.40        | 1838.65        | 12.26         | 8.61                        | 0.50        | 414.49           | 457.64             | 34.18             | 264.70              | 1.91         | 4.17         |
|                    | French fries <sup>1,3</sup>                                                | 71g              | 221.50       | 29.37        | 2.43           | 10.44               | 1.66           | 0            | 149.28         | 0             | 2.43                        | 0           | 12.80            | 320.21             | 26.28             | 88.60               | 0.36         | 0.58         |
|                    | Soda <sup>1,3</sup>                                                        | 620ml            | 210.00       | 56.00        | 0              | 0                   | 0              | 0            | 55.00          | 56.00         | 0                           | 0           | 6.20             | 31.00              | 0                 | 55.80               | 0.56         | 0.12         |
| Afternoon<br>Snack | Strawberries <sup>1</sup>                                                  | 100g             | 32.00        | 7.68         | 0.67           | 0.30                | 0.02           | 0            | 1.00           | 4.89          | 2.00                        | 0           | 16.00            | 153.00             | 13.00             | 24.00               | 0.14         | 0.41         |
|                    | Plant-based<br>beef jerky <sup>1</sup>                                     | 35g              | 112.35       | 10.00        | 12.50          | 1.25                | 0              | 0            | 800.10         | 5.01          | 0                           | 0           | 0                | 0                  | 6.72              | 133.56              | 0.69         | 1.50         |
| Evening Meal       | Plant-based<br>chicken<br>tenders <sup>1,3</sup>                           | 104g             | 193.13       | 15.70        | 13.73          | 9.83                | 1.65           | 0            | 1226.98        | 0             | 0                           | 0           | 0.50             | 0.16               | 17.02             | 335.00              | 0.70         | 2.36         |
|                    | Ketchup <sup>1</sup>                                                       | 15g              | 15.15        | 4.11         | 0.16           | 0.02                | 0              | 0            | 136.05         | 3.20          | 0.05                        | 0           | 2.25             | 42.15              | 1.95              | 3.90                | 0.03         | 0.05         |
|                    | Stir-fried<br>broccoli <sup>1,2</sup>                                      | 93g              | 65.56        | 9.08         | 2.78           | 2.89                | 2.24           | 0            | 222.30         | 1.42          | 2.24                        | 0           | 39.35            | 296.14             | 17.86             | 66.30               | 0.40         | 0.69         |
|                    | White rice <sup>1</sup>                                                    | 60g              | 77.40        | 16.79        | 1.60           | 0.17                | 0.05           | 0            | 147.00         | 0.03          | 0.24                        | 0           | 6.00             | 21.00              | 7.20              | 25.80               | 0.29         | 0.71         |
| Dessert            | Vegan coconut<br>ice cream <sup>1</sup>                                    | 80g              | 234.40       | 20.00        | 2.61           | 18.26               | 11.30          | 0            | 4.00           | 14.78         | 1.76                        | 0           | 17.60            | 174.60             | 29.20             | 73.20               | 0.65         | 1.26         |
|                    | Peach <sup>1</sup>                                                         | 150g             | 63.00        | 15.20        | 1.36           | 0.41                | 0.03           | 0            | 19.50          | 12.60         | 2.25                        | 0           | 6.00             | 183.00             | 12.00             | 33.00               | 0.35         | 0.51         |
| Total              |                                                                            |                  | 2516.7       | 296.8        | 107.8          | 105.8               | 40.5           | 23.4         | 8053.0         | 131.8         | 22.1                        | 1.2         | 853.9            | 2291.5             | 256.9             | 1545.6              | 8.6          | 19.3         |

Sources: <sup>1</sup> United States Department of Agriculture [1], <sup>2</sup> Health Promotion Board [3], <sup>3</sup> Internet sources [2,6], <sup>4</sup> On-pack nutritional labels. Nutritional information of all food items (as prepared and ready-to-eat) was calculated by adding fat (oil), and sodium (salt) and/or garnishes such as garlic to raw ingredients. Dashes denote values not listed on nutritional labels or in databases. Carbs = carbohydrate; Sat Fat = saturated fat; Chol = cholesterol; B12 = Vitamin B12.

Table S6: Vegan-Traditional (Vegan-Trad) Diet

|                    | Item                                                                     | Serving         | Calorie<br>s | Carbs<br>(g) | Protein<br>(g) | Total<br>Fat<br>(g) | Sat<br>Fat (g) | Chol<br>(mg) | Sodium<br>(mg) | Suga<br>r (g) | Dietar<br>y<br>Fibre<br>(g) | B12<br>(ug) | Calciu<br>m (mg) | Potassiu<br>m (mg) | Magnesi<br>m (mg) | Phosphoru<br>s (mg) | Zinc<br>(mg) | Iron<br>(mg) |
|--------------------|--------------------------------------------------------------------------|-----------------|--------------|--------------|----------------|---------------------|----------------|--------------|----------------|---------------|-----------------------------|-------------|------------------|--------------------|-------------------|---------------------|--------------|--------------|
| Breakfast          | White bread <sup>1</sup>                                                 | 1 slice,<br>48g | 118.75       | 23.75        | 3.24           | 1.08                | 0              | 0            | 226.70         | 2.16          | 1.09                        | 0           | 43.18            | 55.58              | 17.06             | 48.93               | 0.42         | 2.32         |
|                    | Peanut butter <sup>1</sup>                                               | 15g             | 105.00       | 3.00         | 4.50           | 8.00                | 1.50           | 0            | 19.95          | 1.00          | 1.01                        | 0           | 10.05            | 100.05             | 25.5              | 55.35               | 0.42         | 0.36         |
|                    | Plant-based<br>egg omelette<br>with black<br>beans <sup>1,2</sup>        | 139g            | 273.27       | 13.67        | 13.52          | 18.36               | 0.73           | 0            | 427.59         | 0.16          | 4.35                        | 0           | 17.82            | 220.06             | 42.68             | 85.84               | 0.69         | 1.27         |
|                    | Soymilk <sup>3</sup>                                                     | 300ml           | 167.75       | 23.49        | 7.93           | 4.88                | 0.82           | 0            | 42.70          | 23.18         | 1.83                        | 1.17        | 30.50            | 298.90             | 64.50             | 146.40              | 0.61         | 1.22         |
| Morning            | Strawberries <sup>1</sup>                                                | 100g            | 32.00        | 7.68         | 0.67           | 0.30                | 0.02           | 0            | 1.00           | 4.89          | 2.00                        | 0           | 16.00            | 153.00             | 13.00             | 24.00               | 0.14         | 0.41         |
| Snack              | Black coffee <sup>1</sup>                                                | 250ml           | 5.00         | 0.85         | 0.25           | 0                   | 0.01           | 0            | 10.00          | 0             | 0                           | 0           | 10.00            | 75.00              | 10.00             | 7.50                | 0.03         | 0.10         |
| Lunch              | Bean burrito<br>with hummus<br>and dairy-free<br>cheese <sup>1,2,3</sup> | 266g            | 489.65       | 70.71        | 14.87          | 17.22               | 8.10           | 0            | 1417.05        | 9.25          | 8.96                        | 0           | 167.85           | 547.15             | 71.05             | 339.70              | 1.76         | 4.85         |
|                    | French fries <sup>1,2</sup>                                              | 31g             | 96.71        | 12.82        | 1.06           | 4.56                | 0.73           | 0            | 65.18          | 0             | 1.06                        | 0           | 5.59             | 139.81             | 11.47             | 38.68               | 0.16         | 0.25         |
|                    | Soda <sup>1,2</sup>                                                      | 620ml           | 210.00       | 56.00        | 0              | 0                   | 0              | 0            | 55.00          | 56.00         | 0                           | 0           | 6.20             | 31.00              | 0                 | 55.80               | 0.56         | 0.12         |
| Afternoon<br>Snack | Pumpkin<br>seeds <sup>1</sup>                                            | 30g             | 172.20       | 4.41         | 8.94           | 14.70               | 2.56           | 0            | 5.40           | 0.39          | 1.95                        | 0           | 15.60            | 236.40             | 165.00            | 351.00              | 2.29         | 2.42         |
|                    | Soymilk <sup>3</sup>                                                     | 300ml           | 167.75       | 23.49        | 7.93           | 4.88                | 0.82           | 0            | 42.70          | 23.18         | 1.83                        | 1.17        | 30.50            | 298.90             | 64.50             | 146.40              | 0.61         | 1.22         |
| Evening Meal       | Tofu <sup>1,3</sup>                                                      | 157g            | 191.50       | 3.80         | 15.20          | 12.09               | 1.28           | 0            | 804.50         | 0             | 1.95                        | 0           | 114.48           | 474.16             | 48.62             | 178.50              | 1.65         | 2.06         |
|                    | Black beans <sup>1</sup>                                                 | 81g             | 105.60       | 18.97        | 7.09           | 0.43                | 0.11           | 0            | 383.60         | 0.26          | 6.96                        | 0           | 21.72            | 284.04             | 56.01             | 112.00              | 0.90         | 1.68         |
|                    | Stir-fried<br>broccoli <sup>1,2</sup>                                    | 94g             | 79.46        | 9.06         | 2.78           | 4.31                | 0.39           | 0            | 28.30          | 1.42          | 2.24                        | 0           | 39.20            | 296.10             | 17.85             | 66.30               | 0.39         | 0.69         |
|                    | White rice <sup>1</sup>                                                  | 25g             | 32.25        | 7.00         | 0.67           | 0.07                | 0.02           | 0            | 61.25          | 0.01          | 0.10                        | 0           | 2.50             | 8.75               | 3.00              | 10.75               | 0.12         | 0.30         |
| Dessert            | Coconut<br>yogurt <sup>1</sup>                                           | 50g             | 32.00        | 5.60         | 0.40           | 1.00                | 1.00           | 0            | 6.00           | 2.00          | 1.20                        | 0           | 0                | 28.00              | 12.5              | 17.5                | 0.2          | 0            |
|                    | Peach <sup>1</sup>                                                       | 150g            | 63.00        | 15.20        | 1.36           | 0.41                | 0.03           | 0            | 19.50          | 12.60         | 2.25                        | 0           | 6.00             | 183.00             | 12.00             | 33.00               | 0.35         | 0.51         |
|                    | Pumpkin<br>seeds <sup>1</sup>                                            | 30g             | 172.20       | 4.41         | 8.94           | 14.70               | 2.56           | 0            | 5.40           | 0.39          | 1.95                        | 0           | 15.60            | 236.40             | 165.00            | 351.00              | 2.29         | 2.42         |
| Total              |                                                                          |                 | 2514.1       | 303.9        | 99.3           | 107.0               | 20.7           | 0            | 3621.8         | 136.9         | 40.7                        | 2.3         | 552.8            | 3666.3             | 799.7             | 2068.6              | 13.6         | 22.2         |

Sources: <sup>1</sup> United States Department of Agriculture [1], <sup>2</sup> Internet sources [2,6], <sup>3</sup> Health Promotion Board [3]. Nutritional information of all food items (as prepared and ready-to-eat) was calculated by adding fat (oil), and sodium (salt) and/or garnishes such as garlic to raw ingredients. Dashes denote values not listed on nutritional labels or in databases. Carbs = carbohydrate; Sat Fat = saturated fat; Chol = cholesterol; B12 = Vitamin B12.

Table S7: Vegan-Novel (Vegan-New) Diet

|                    | Item                                                              | Serving          | Calorie<br>s | Carbs<br>(g) | Protein<br>(g) | Total<br>Fat<br>(g) | Sat<br>Fat (g) | Chol<br>(mg) | Sodium<br>(mg) | Suga<br>r (g) | Dietar<br>y<br>Fibre<br>(g) | B12<br>(ug) | Calciu<br>m (mg) | Potassiu<br>m (mg) | Magnesi<br>m (mg) | Phosphoru<br>s (mg) | Zinc<br>(mg) | Iron<br>(mg) |
|--------------------|-------------------------------------------------------------------|------------------|--------------|--------------|----------------|---------------------|----------------|--------------|----------------|---------------|-----------------------------|-------------|------------------|--------------------|-------------------|---------------------|--------------|--------------|
| Breakfast          | White bread <sup>1</sup>                                          | 2 slices,<br>95g | 237.50       | 47.50        | 6.48           | 2.16                | 0              | 0            | 453.41         | 4.32          | 2.18                        | 0           | 86.36            | 111.15             | 34.11             | 97.85               | 0.84         | 4.64         |
|                    | Coconut<br>spread <sup>1</sup>                                    | 14g              | 35.50        | 7.10         | 0              | 0.71                | 0.71           | 0            | 46.15          | 4.97          | 0                           | 0           | 0                | 13.15              | 1.85              | 5                   | 0.03         | 0            |
|                    | Plant-based<br>egg omelette <sup>1,2</sup>                        | 85g              | 143.93       | 1.83         | 9.09           | 11.07               | 1.65           | 0            | 1279.09        | 0             | 0                           | 0           | 4.94             | 42.76              | 7.71              | 15.84               | 0.14         | 0.23         |
|                    | Bacon,<br>meatless <sup>1</sup>                                   | 43g              | 275.67       | 8.53         | 11.95          | 22.62               | 10.46          | 0            | 1024.85        | 3.12          | 1.23                        | 0           | 10.18            | 84.84              | 19.03             | 116.68              | 0.67         | 1.67         |
|                    | Ketchup <sup>1</sup>                                              | 15g              | 15.15        | 4.11         | 0.16           | 0.02                | 0              | 0            | 136.05         | 3.20          | 0.05                        | 0           | 2.25             | 42.15              | 1.95              | 3.90                | 0.03         | 0.05         |
|                    | Soymilk <sup>2</sup>                                              | 300ml            | 167.75       | 23.49        | 7.93           | 4.88                | 0.82           | 0            | 42.70          | 23.18         | 1.83                        | 1.17        | 30.50            | 298.90             | 64.50             | 146.40              | 0.61         | 1.22         |
| Morning<br>Snack   | Plant-based<br>beef jerky <sup>1</sup>                            | 30g              | 96.3         | 8.57         | 10.71          | 1.07                | 0              | 0            | 685.8          | 4.29          | 0                           | 0           | 0                | 0                  | 5.76              | 114.48              | 0.59         | 1.29         |
|                    | Black coffee <sup>1</sup>                                         | 250ml            | 5.00         | 0.85         | 0.25           | 0                   | 0.01           | 0            | 10.00          | 0             | 0                           | 0           | 10.00            | 75.00              | 10.00             | 7.50                | 0.03         | 0.10         |
| Lunch              | Plant-based<br>burger with<br>dairy-free<br>cheese <sup>1,3</sup> | 268g             | 610.82       | 50.81        | 24.76          | 35.86               | 19.10          | 0            | 2014.85        | 7.54          | 3.95                        | 0           | 202.33           | 415.28             | 30.88             | 89.90               | 0.76         | 5.11         |
|                    | French fries <sup>1,2</sup>                                       | 31g              | 96.71        | 12.82        | 1.06           | 4.56                | 0.73           | 0            | 65.18          | 0             | 1.06                        | 0           | 5.59             | 139.81             | 11.47             | 38.68               | 0.16         | 0.25         |
|                    | Soda <sup>1,2</sup>                                               | 620ml            | 210.00       | 56.00        | 0              | 0                   | 0              | 0            | 55.00          | 56.00         | 0                           | 0           | 6.20             | 31.00              | 0                 | 55.80               | 0.56         | 0.12         |
| Afternoon<br>Snack | Plant-based<br>beef jerky <sup>1</sup>                            | 30g              | 96.30        | 8.57         | 10.71          | 1.07                | 0              | 0            | 685.80         | 4.29          | 0                           | 0           | 0                | 0                  | 5.76              | 114.48              | 0.59         | 1.29         |
|                    | Unsalted nuts <sup>1</sup>                                        | 8g               | 46.96        | 1.70         | 1.95           | 3.97                | 0.62           | 0            | 0.48           | 0.39          | 0.67                        | 0           | 4.64             | 50.72              | 14.24             | 29.04               | 0.22         | 0.13         |
| Evening Meal       | Plant-based<br>chicken<br>tenders <sup>1,3</sup>                  | 104g             | 193.13       | 15.70        | 13.73          | 9.83                | 1.65           | 0            | 1226.98        | 0             | 0                           | 0           | 0.50             | 0.16               | 17.02             | 335.00              | 0.70         | 2.36         |
|                    | Ketchup <sup>1</sup>                                              | 15g              | 15.15        | 4.11         | 0.16           | 0.02                | 0              | 0            | 136.05         | 3.20          | 0.05                        | 0           | 2.25             | 42.15              | 1.95              | 3.90                | 0.03         | 0.05         |
|                    | Stir-fried<br>broccoli <sup>1,3</sup>                             | 97g              | 98.05        | 9.11         | 2.78           | 6.76                | 5.46           | 0            | 222.30         | 1.42          | 2.24                        | 0           | 39.39            | 296.14             | 17.86             | 66.30               | 0.40         | 0.69         |
|                    | White rice <sup>1</sup>                                           | 25g              | 32.25        | 7.00         | 0.67           | 0.07                | 0.02           | 0            | 61.25          | 0.01          | 0.10                        | 0           | 2.50             | 8.75               | 3.00              | 10.75               | 0.12         | 0.30         |
| Dessert            | Strawberries <sup>1</sup>                                         | 100g             | 32.00        | 7.68         | 0.67           | 0.30                | 0.02           | 0            | 1.00           | 4.89          | 2.00                        | 0           | 16.00            | 153.00             | 13.00             | 24.00               | 0.14         | 0.41         |
|                    | Peach <sup>1</sup>                                                | 150g             | 63.00        | 15.20        | 1.36           | 0.41                | 0.03           | 0            | 19.50          | 12.60         | 2.25                        | 0           | 6.00             | 183.00             | 12.00             | 33.00               | 0.35         | 0.51         |
| Total              |                                                                   |                  | 2471.2       | 290.7        | 104.4          | 105.4               | 41.3           | 0            | 8166.4         | 133.4         | 17.6                        | 1.2         | 429.6            | 1987.9             | 272.1             | 1308.5              | 7.0          | 20.4         |

Sources: <sup>1</sup> United States Department of Agriculture [1], <sup>2</sup> Internet sources [2,5,6], <sup>3</sup> Health Promotion Board [3]. Nutritional information of all food items (as prepared and ready-to-eat) was calculated by adding fat (oil), and sodium (salt) and/or garnishes such as garlic to raw ingredients. Dashes denote values not listed on nutritional labels or in databases. Carbs = carbohydrate; Sat Fat = saturated fat; Chol = cholesterol; B12 = Vitamin B12.

## References

1. United States Department of Agriculture. FoodData Central. Available online: <http://fdc.nal.usda.gov/> (accessed on 10 March 2021).
2. McDonald's. Nutrition Calculator. Available online: <https://www.mcdonalds.com/us/en-us/about-our-food/nutrition-calculator.html> (accessed on 13 April 2021).
3. Health Promotion Board. Energy & Nutrient Composition of Food. Available online: <https://focos.hpb.gov.sg/eservices/ENCF/> (accessed on 12 March 2021).
4. Beyond Meat. Our Products. Available online: <https://www.beyondmeat.com/products/> (accessed on 9 March 2021).
5. Gardein. Gardein Seven Grain Crispy Tenders. Available online: <https://www.gardein.com/chickn-and-turky/classics/seven-grain-crispy-tenders> (accessed on 10 March 2021).
6. JUST Egg. JUST Egg | Made from plants. Available online: <https://www.ju.st/en-us/products/consumer/egg/egg> (accessed on 15 March 2021).
